# Supplementary material for: Predicting mammalian species at risk of being infected by SARS-CoV-2 from an ACE2 perspective
Source: PubMed Central journal article supplement (PMC7814088; doi:10.1038/s41598-020-80573-x), 2021-01-18
Supplement: 41598_2020_80573_MOESM1_ESM.pdf [file 41598_2020_80573_MOESM1_ESM.pdf]

## **Predicting mammalian species at risk of being infected by SARS-CoV-2 from an ACE2 perspective**

Yulong Wei<sup>1</sup>, Parisa Aris<sup>1</sup>, Heba Farookhi<sup>1</sup>, Xuhua Xia<sup>1,2,\*</sup>

1. Department of Biology, University of Ottawa, 30 Marie Curie, P.O. Box 450, Station A, Ottawa, Ontario, Canada, K1N 6N5. Tel: (613) 562-5800 ext. 6886, Fax: (613) 562-5486.

2. Ottawa Institute of Systems Biology, Ottawa, Ontario, Canada K1H 8M5.

\* Corresponding author E-mail: [Xuhua.Xia@uottawa.ca](mailto:Xuhua.Xia@uottawa.ca)

| Order    | Family           | Species                       | ACE2 binding hotspots similarities with HACE2 |     |     |     |     |     |     |     |     |     |      |      |      |      |      |       |       |                                                                  | Total Similarity | Total Similarity |
|----------|------------------|-------------------------------|-----------------------------------------------|-----|-----|-----|-----|-----|-----|-----|-----|-----|------|------|------|------|------|-------|-------|------------------------------------------------------------------|------------------|------------------|
| Primates | Aotidae          | <i>Aotus nancymae</i>         | 519                                           | Q24 | D30 | K31 | H34 | E35 | E37 | D38 | H41 | Q42 | L79  | T82  | Y83  | H83  | K353 | R393  | 12/15 | 5-9 less<br>6 to 7<br>8 to 9<br>10 to 11<br>12 to 13<br>14 to 15 |                  |                  |
|          |                  | <i>Sapajus apella</i>         | 519                                           | Q24 | D30 | K31 | H34 | E35 | E37 | D38 | H41 | Q42 | L79  | T82  | Y83  | H83  | K353 | R393  | 12/15 |                                                                  |                  |                  |
|          |                  | <i>Macaca fascicularis</i>    | 519                                           | Q24 | D30 | K31 | H34 | E35 | E37 | D38 | H41 | Q42 | L79  | M82  | H83  | K353 | R393 | 15/15 |       |                                                                  |                  |                  |
|          | Cercopithecoidea | <i>Macaca mulatta</i>         | 519                                           | Q24 | D30 | K31 | H34 | E35 | E37 | D38 | H41 | Q42 | L79  | M82  | H83  | K353 | R393 | 15/15 |       |                                                                  |                  |                  |
|          |                  | <i>Macaca nemestrina</i>      | 519                                           | Q24 | D30 | K31 | H34 | E35 | E37 | D38 | H41 | Q42 | L79  | M82  | H83  | K353 | R393 | 15/15 |       |                                                                  |                  |                  |
|          |                  | <i>Mandrillus leucophaeus</i> | 519                                           | Q24 | D30 | K31 | H34 | E35 | E37 | D38 | H41 | Q42 | L79  | M82  | H83  | K353 | R393 | 15/15 |       |                                                                  |                  |                  |
|          | Hominidae        | <i>Pan paniscus</i>           | 519                                           | Q24 | D30 | K31 | H34 | E35 | E37 | D38 | H41 | Q42 | L79  | M82  | H83  | K353 | R393 | 15/15 |       |                                                                  |                  |                  |
|          |                  | <i>Pan troglodytes</i>        | 519                                           | Q24 | D30 | K31 | H34 | E35 | E37 | D38 | H41 | Q42 | L79  | M82  | H83  | K353 | R393 | 15/15 |       |                                                                  |                  |                  |
|          |                  | <i>Pongo abelii</i>           | 519                                           | Q24 | D30 | K31 | H34 | E35 | E37 | D38 | H41 | Q42 | L79  | M82  | H83  | K353 | R393 | 15/15 |       |                                                                  |                  |                  |
|          |                  | <i>Hylobates moloch</i>       | 519                                           | Q24 | D30 | K31 | H34 | E35 | E37 | D38 | H41 | Q42 | L79  | M82  | H83  | K353 | R393 | 15/15 |       |                                                                  |                  |                  |
|          |                  | <i>Nasucas leucones</i>       | 519                                           | Q24 | D30 | K31 | H34 | E35 | E37 | D38 | H41 | Q42 | L79  | M82  | H83  | K353 | R393 | 15/15 |       |                                                                  |                  |                  |
|          |                  | <i>Propithecus coquereli</i>  | 540                                           | Q45 | D51 | K52 | H55 | E56 | F58 | D59 | Y62 | O63 | L100 | T101 | Y104 | K124 | R144 | 14/15 |       |                                                                  |                  |                  |
|          |                  | <i>Carlito synticha</i>       | 519                                           | Q24 | D30 | K31 | Q34 | E35 | E37 | D38 | H41 | Q42 | L79  | S83  | H83  | N353 | R393 | 10/15 |       |                                                                  |                  |                  |

| Order           | Family                            | Species                | ACE2 binding hotspots similarities with HACE2 |     |     |     |     |     |     |     |     |     |     |     |     |      |      |       |                                                                  |  | Total Similarity | Total Similarity |
|-----------------|-----------------------------------|------------------------|-----------------------------------------------|-----|-----|-----|-----|-----|-----|-----|-----|-----|-----|-----|-----|------|------|-------|------------------------------------------------------------------|--|------------------|------------------|
| Balaenopteridae | <i>Balaenoptera acutorostrata</i> | 519                    | Q24                                           | D30 | K31 | H34 | E35 | E37 | D38 | H41 | Q42 | L79 | T82 | Y83 | H83 | K352 | R392 | 11/15 | 5-9 less<br>6 to 7<br>8 to 9<br>10 to 11<br>12 to 13<br>14 to 15 |  |                  |                  |
|                 |                                   | <i>Bos indicus</i>     | 519                                           | Q24 | E30 | K31 | H34 | E35 | E37 | D38 | H41 | Q42 | M79 | T82 | Y83 | K352 | R392 | 12/15 |                                                                  |  |                  |                  |
|                 |                                   | <i>Bos mutus</i>       | 519                                           | Q24 | E30 | K31 | H34 | E35 | E37 | D38 | H41 | Q42 | M79 | T82 | Y83 | K352 | R392 | 12/15 |                                                                  |  |                  |                  |
|                 | Bovidae                           | <i>Bos taurus</i>      | 519                                           | Q24 | E30 | K31 | H34 | E35 | E37 | D38 | H41 | Q42 | M79 | T82 | Y83 | K352 | R392 | 12/15 |                                                                  |  |                  |                  |
|                 |                                   | <i>Bubalus bubalis</i> | 518                                           | Q23 | E29 | K30 | H33 | E34 | E36 | D37 | H40 | Q41 | M78 | T81 | Y82 | K351 | R391 | 12/15 |                                                                  |  |                  |                  |
|                 |                                   | <i>Capra hircus</i>    | 519                                           | Q24 | E30 | K31 | H34 | E35 | E37 | D38 | H41 | Q42 | M79 | T82 | Y83 | K352 | R392 | 12/15 |                                                                  |  |                  |                  |
|                 | Camelidae                         | <i>Ovis aries</i>      | 519                                           | Q24 | E30 | K31 | H34 | E35 | E37 | D38 | H41 | Q42 | M79 | T82 | Y83 | K352 | R392 | 12/15 |                                                                  |  |                  |                  |
|                 |                                   | <i>Camelus ferus</i>   | 519                                           | L24 | E30 | E31 | H34 | E35 | E37 | D38 | H41 | Q42 | L79 | T82 | Y83 | K353 | R393 | 10/15 |                                                                  |  |                  |                  |
|                 |                                   | <i>Vicugna pacos</i>   | 519                                           | L24 | E30 | E31 | H34 | E35 | E37 | D38 | H41 | Q42 | L79 | T82 | Y83 | K353 | R393 | 10/15 |                                                                  |  |                  |                  |

| Order        | Family       | Species                           | ACE2 binding hotspots similarities with HACE2 |     |     |     |     |     |     |     |     |     |     |     |     |      |      |       |                                                                  |  | Total Similarity | Total Similarity |
|--------------|--------------|-----------------------------------|-----------------------------------------------|-----|-----|-----|-----|-----|-----|-----|-----|-----|-----|-----|-----|------|------|-------|------------------------------------------------------------------|--|------------------|------------------|
| Artiodactyla | Delphinidae  | <i>Globicephala melas</i>         | 519                                           | R24 | D30 | K31 | R34 | E35 | E37 | D38 | H41 | Q42 | L79 | T82 | Y83 | K352 | R392 | 10/15 | 5-9 less<br>6 to 7<br>8 to 9<br>10 to 11<br>12 to 13<br>14 to 15 |  |                  |                  |
|              |              | <i>Lagenorhynchus obliquidens</i> | 519                                           | R24 | D30 | K31 | R34 | E35 | E37 | D38 | H41 | Q42 | L79 | T82 | Y83 | K352 | R392 | 10/15 |                                                                  |  |                  |                  |
|              |              | <i>Orcinus orca</i>               | 519                                           | R24 | D30 | K31 | R34 | E35 | E37 | D38 | H41 | Q42 | L79 | T82 | Y83 | K352 | R392 | 10/15 |                                                                  |  |                  |                  |
|              | Lipotidae    | <i>Tursiops truncatus</i>         | 519                                           | R24 | D30 | K31 | R34 | E35 | E37 | D38 | H41 | Q42 | L79 | T82 | Y83 | K352 | R392 | 10/15 |                                                                  |  |                  |                  |
|              |              | <i>Lipotes vexillifer</i>         | 519                                           | R24 | D30 | K31 | R34 | E35 | E37 | D38 | H41 | Q42 | L79 | T82 | R83 | K352 | R392 | 10/15 |                                                                  |  |                  |                  |
|              |              | <i>Delphinapterus leucas</i>      | 519                                           | Q24 | D30 | K31 | H34 | E35 | E37 | D38 | H41 | Q42 | L79 | T82 | Y83 | K352 | R392 | 12/15 |                                                                  |  |                  |                  |
|              | Monodontidae | <i>Monodon monoceros</i>          | 519                                           | Q24 | D30 | K31 | H34 | E35 | E37 | D38 | H41 | Q42 | L79 | T82 | Y83 | K352 | R392 | 12/15 |                                                                  |  |                  |                  |
|              |              | <i>Neophocaena asiatica</i>       | 519                                           | Q24 | D30 | K31 | H34 | E35 | E37 | D38 | H41 | Q42 | L79 | T82 | Y83 | K352 | R392 | 12/15 |                                                                  |  |                  |                  |
|              |              | <i>Phocoena sinus</i>             | 519                                           | Q24 | D30 | K31 | H34 | E35 | E37 | D38 | H41 | Q42 | L79 | T82 | Y83 | K352 | R392 | 12/15 |                                                                  |  |                  |                  |
|              | Phocoenidae  | <i>Phocoena cotopsis</i>          | 519                                           | Q24 | D30 | K31 | H34 | E35 | E37 | D38 | H41 | Q42 | L79 | T82 | Y83 | K352 | R392 | 12/15 |                                                                  |  |                  |                  |
|              |              | <i>Physeter cotodon</i>           | 519                                           | Q24 | E30 | K31 | H34 | E35 | E37 | D38 | H41 | Q42 | L79 | T82 | Y83 | K352 | R392 | 12/15 |                                                                  |  |                  |                  |
|              |              | <i>Sus scrofa</i>                 | 519                                           | L24 | E30 | K31 | L34 | E35 | E37 | D38 | H41 | Q42 | L79 | T82 | Y83 | K353 | R393 | 10/15 |                                                                  |  |                  |                  |

| Order       | Family                    | Species                          | ACE2 binding hotspots similarities with HACE2 |     |     |     |     |     |     |     |     |     |     |     |      |      |      |                                                                  |       |  | Total Similarity | Total Similarity |
|-------------|---------------------------|----------------------------------|-----------------------------------------------|-----|-----|-----|-----|-----|-----|-----|-----|-----|-----|-----|------|------|------|------------------------------------------------------------------|-------|--|------------------|------------------|
| Hippodridae | <i>Hippodamia armiger</i> | 519                              | L24                                           | D30 | K31 | T34 | E35 | E37 | D38 | H41 | L42 | R29 | D83 | Y83 | K353 | R393 | 9/15 | 5-9 less<br>6 to 7<br>8 to 9<br>10 to 11<br>12 to 13<br>14 to 15 |       |  |                  |                  |
|             |                           | <i>Mniopteris natalensis</i>     | 519                                           | K24 | E30 | G31 | S34 | Q35 | E37 | D38 | H42 | Q42 | L79 | Y82 | H83  | K353 | R393 |                                                                  | 7/15  |  |                  |                  |
|             |                           | <i>Phyllotomus discolor</i>      | 519                                           | Q24 | E30 | N31 | H34 | E35 | E37 | D38 | H41 | Q42 | L79 | M82 | Y83  | K350 | R390 |                                                                  | 10/15 |  |                  |                  |
|             | Pteropodidae              | <i>Pteropus alecto</i>           | 519                                           | L24 | E30 | K31 | T34 | E35 | E37 | D38 | H41 | Q42 | L79 | M82 | H83  | K353 | R393 |                                                                  | 10/15 |  |                  |                  |
|             |                           | <i>Pteropus vampyrus</i>         | 519                                           | L24 | E30 | K31 | T34 | E35 | E37 | D38 | H41 | Q42 | L79 | M82 | H83  | K352 | R392 |                                                                  | 10/15 |  |                  |                  |
|             |                           | <i>Rousettus aegyptiacus</i>     | 519                                           | L24 | E30 | K31 | T34 | E35 | E37 | D38 | H41 | Q42 | L79 | T82 | Y83  | K353 | R393 |                                                                  | 11/15 |  |                  |                  |
|             | Chiroptera                | <i>Rousettus eschenauii</i>      | 519                                           | L24 | E30 | K31 | T34 | E35 | E37 | D38 | H41 | Q42 | L79 | T82 | Y83  | K353 | R393 |                                                                  | 11/15 |  |                  |                  |
|             |                           | <i>Rhinolophus ferrumequinum</i> | 519                                           | L24 | D30 | D31 | S34 | E35 | E37 | N38 | H41 | Q42 | L79 | N82 | H83  | K353 | R393 |                                                                  | 8/15  |  |                  |                  |
|             |                           | <i>Rhinolophus macrotis</i>      | 519                                           | L24 | D30 | K31 | S34 | K35 | E37 | D38 | H41 | E42 | L79 | N82 | H83  | K353 | R393 |                                                                  | 10/15 |  |                  |                  |

| Order   | Family                    | Species                         | ACE2 binding hotspots similarities with HACE2 |     |     |     |     |     |     |     |     |     |     |     |      |      |       |                                                                  |       |  | Total Similarity | Total Similarity |
|---------|---------------------------|---------------------------------|-----------------------------------------------|-----|-----|-----|-----|-----|-----|-----|-----|-----|-----|-----|------|------|-------|------------------------------------------------------------------|-------|--|------------------|------------------|
| Canidae | <i>Canis lupus dingii</i> | 519                             | L23                                           | E29 | K30 | Y33 | E34 | E36 | E37 | H40 | Q41 | L78 | T83 | Y82 | K352 | R392 | 10/15 | 5-9 less<br>6 to 7<br>8 to 9<br>10 to 11<br>12 to 13<br>14 to 15 |       |  |                  |                  |
|         |                           | <i>Canis lupus familiaris</i>   | 519                                           | L23 | E29 | K30 | Y33 | E34 | E36 | E37 | H40 | Q41 | L78 | T83 | Y82  | K352 | R392  |                                                                  | 10/15 |  |                  |                  |
|         |                           | <i>Nyctereutes procyonoides</i> | 519                                           | L23 | E29 | K30 | Y33 | E34 | E36 | E37 | H40 | Q41 | L78 | T83 | Y82  | K352 | R392  |                                                                  | 10/15 |  |                  |                  |
|         | Felidae                   | <i>Vulpes vulpes</i>            | 519                                           | L23 | E29 | K30 | Y33 | E34 | E36 | E37 | H40 | Q41 | L78 | T83 | Y82  | K352 | R392  |                                                                  | 10/15 |  |                  |                  |
|         |                           | <i>Felis catus</i>              | 519                                           | L24 | E30 | K31 | H34 | E35 | E37 | D38 | H41 | Q42 | L79 | T82 | Y83  | K353 | R393  |                                                                  | 11/15 |  |                  |                  |
|         |                           | <i>Lynx canadensis</i>          | 519                                           | L24 | E30 | K31 | H34 | E35 | E37 | D38 | H41 | Q42 | L79 | T82 | Y83  | K353 | R393  |                                                                  | 11/15 |  |                  |                  |
|         | Herpestidae               | <i>Panthera tigris altaica</i>  | 511                                           | L16 | F22 | K23 | H26 | F27 | L29 | Q30 | Y33 | Q34 | L71 | T74 | F75  | K436 | R485  |                                                                  | 11/15 |  |                  |                  |
|         |                           | <i>Puma concolor</i>            | 519                                           | L24 | E30 | K31 | H34 | E35 | E37 | D38 | H41 | Q42 | L79 | T82 | Y83  | K353 | R393  |                                                                  | 11/15 |  |                  |                  |
|         |                           | <i>Suricata suricatta</i>       | 519                                           | L24 | E30 | Q31 | H34 | E35 | Q37 | D38 | H41 | L42 | R79 | A82 | Y83  | K353 | R393  |                                                                  | 7/15  |  |                  |                  |

| Order   | Family                    | Species                         | ACE2 binding hotspots similarities with HACE2 |     |     |     |     |     |     |     |     |     |     |     |      |      |       |                                                                  |       |  | Total Similarity | Total Similarity |
|---------|---------------------------|---------------------------------|-----------------------------------------------|-----|-----|-----|-----|-----|-----|-----|-----|-----|-----|-----|------|------|-------|------------------------------------------------------------------|-------|--|------------------|------------------|
| Canidae | <i>Canis lupus dingii</i> | 519                             | L23                                           | E29 | K30 | Y33 | E34 | E36 | E37 | H40 | Q41 | L78 | T83 | Y82 | K352 | R392 | 10/15 | 5-9 less<br>6 to 7<br>8 to 9<br>10 to 11<br>12 to 13<br>14 to 15 |       |  |                  |                  |
|         |                           | <i>Canis lupus familiaris</i>   | 519                                           | L23 | E29 | K30 | Y33 | E34 | E36 | E37 | H40 | Q41 | L78 | T83 | Y82  | K352 | R392  |                                                                  | 10/15 |  |                  |                  |
|         |                           | <i>Nyctereutes procyonoides</i> | 519                                           | L23 | E29 | K30 | Y33 | E34 | E36 | E37 | H40 | Q41 | L78 | T83 | Y82  | K352 | R392  |                                                                  | 10/15 |  |                  |                  |
|         | Felidae                   | <i>Vulpes vulpes</i>            | 519                                           | L23 | E29 | K30 | Y33 | E34 | E36 | E37 | H40 | Q41 | L78 | T83 | Y82  | K352 | R392  |                                                                  | 10/15 |  |                  |                  |
|         |                           | <i>Felis catus</i>              | 519                                           | L24 | E30 | K31 | H34 | E35 | E37 | D38 | H41 | Q42 | L79 | T82 | Y83  | K353 | R393  |                                                                  | 11/15 |  |                  |                  |
|         |                           | <i>Lynx canadensis</i>          | 519                                           | L24 | E30 | K31 | H34 | E35 | E37 | D38 | H41 | Q42 | L79 | T82 | Y83  | K353 | R393  |                                                                  | 11/15 |  |                  |                  |



| Order                              | Family                           | Species                           | ACE2 binding hotspots similarities with hACE2 |      |      |      |      |      |      |      |      |      |      |                                                      |   |  | Total Similarity | Total similarity |
|------------------------------------|----------------------------------|-----------------------------------|-----------------------------------------------|------|------|------|------|------|------|------|------|------|------|------------------------------------------------------|---|--|------------------|------------------|
| Afrosoricida                       | Chrysochloridae                  | <i>Chrysochloris asiatica</i>     | N30                                           | H40  | K81  | F82  | S83  | K347 | D348 | D349 | F350 | R351 | 4    | 0 to 1<br>2 to 3<br>4 to 5<br>6 to 7<br>8 to 9<br>10 |   |  |                  |                  |
|                                    |                                  | <i>Echinops tefsi</i>             | T31                                           | Y41  | K82  | F83  | S84  | L348 | D349 | D350 | F351 | R352 | 4    |                                                      |   |  |                  |                  |
|                                    | Balaenopteridae                  | <i>Balaenoptera acutorostrata</i> | K31                                           | Y41  | T82  | Y83  | P84  | K352 | G353 | D354 | F355 | R356 | 9    |                                                      |   |  |                  |                  |
|                                    |                                  | <i>Bos indicus</i>                | K31                                           | Y41  | T82  | Y83  | S84  | K352 | G353 | D354 | F355 | R356 | 8    |                                                      |   |  |                  |                  |
|                                    | Bovidae                          | <i>Bos mutus</i>                  | K31                                           | Y41  | T82  | Y83  | S84  | K352 | G353 | D354 | F355 | R356 | 8    |                                                      |   |  |                  |                  |
|                                    |                                  | <i>Bos taurus</i>                 | K31                                           | Y41  | T82  | Y83  | S84  | K352 | G353 | D354 | F355 | R356 | 8    |                                                      |   |  |                  |                  |
|                                    |                                  | <i>Bubalis bubalis</i>            | K30                                           | Y40  | T81  | Y82  | S83  | K351 | G352 | D353 | F354 | R355 | 8    |                                                      |   |  |                  |                  |
|                                    | Camelidae                        | <i>Camelus bactrianus</i>         | K31                                           | Y41  | T82  | Y83  | S84  | K352 | G353 | D354 | F355 | R356 | 8    |                                                      |   |  |                  |                  |
|                                    |                                  | <i>Ovis aries</i>                 | K31                                           | Y41  | T82  | Y83  | S84  | K352 | G353 | D354 | F355 | R356 | 8    |                                                      |   |  |                  |                  |
|                                    |                                  | <i>Camelus ferus</i>              | E31                                           | Y41  | T82  | Y83  | P84  | K353 | G354 | D355 | F356 | R357 | 8    |                                                      |   |  |                  |                  |
|                                    | Artiodactyla                     | Camelidae                         | <i>Vicugna pacos</i>                          | E31  | Y41  | I82  | Y83  | P84  | K353 | G354 | D355 | F356 | R357 |                                                      | 8 |  |                  |                  |
|                                    |                                  |                                   | <i>Globicephala melas</i>                     | K31  | Y41  | T82  | Y83  | P84  | K352 | G353 | D354 | F355 | R356 |                                                      | 9 |  |                  |                  |
|                                    |                                  |                                   | <i>Loganorhynchus obliquoides</i>             | K31  | Y41  | T82  | Y83  | P84  | K352 | G353 | D354 | F355 | R356 |                                                      | 9 |  |                  |                  |
|                                    |                                  | Delphinidae                       | <i>Orcinus orca</i>                           | K31  | Y41  | T82  | Y83  | P84  | K352 | G353 | D354 | F355 | R356 |                                                      | 9 |  |                  |                  |
|                                    |                                  |                                   | <i>Tursiops truncatus</i>                     | K31  | Y41  | T82  | Y83  | P84  | K352 | G353 | D354 | F355 | R356 |                                                      | 9 |  |                  |                  |
|                                    | Lipotidae                        | <i>Lipotes vexillifer</i>         | K31                                           | Y41  | T82  | F83  | P84  | K352 | G353 | D354 | F355 | R356 | 8    |                                                      |   |  |                  |                  |
|                                    |                                  | <i>Delphinapterus leucas</i>      | K31                                           | Y41  | T82  | Y83  | P84  | K352 | G353 | D354 | F355 | R356 | 9    |                                                      |   |  |                  |                  |
|                                    | Monodontidae                     | <i>Monodon monoceros</i>          | K31                                           | Y41  | T82  | Y83  | P84  | K352 | G353 | D354 | F355 | R356 | 9    |                                                      |   |  |                  |                  |
| <i>Neophocaena asiaeorientalis</i> |                                  | K31                               | Y41                                           | T82  | Y83  | S84  | K352 | G353 | D354 | F355 | R356 | 8    |      |                                                      |   |  |                  |                  |
| Phocoenidae                        | <i>Phocoena sinus</i>            | K31                               | Y41                                           | T82  | Y83  | S84  | K352 | G353 | D354 | F355 | R356 | 8    |      |                                                      |   |  |                  |                  |
|                                    | <i>Physeter catodon</i>          | K31                               | Y41                                           | T82  | Y83  | P84  | K352 | G353 | D354 | F355 | R356 | 9    |      |                                                      |   |  |                  |                  |
| Suidae                             | <i>Sus scrofa</i>                | K31                               | Y41                                           | T82  | Y83  | P84  | K353 | G354 | D355 | F356 | R357 | 9    |      |                                                      |   |  |                  |                  |
|                                    | <i>Canis lupus dingo</i>         | K30                               | Y40                                           | T81  | Y82  | P83  | K352 | G353 | D354 | F355 | R356 | 9    |      |                                                      |   |  |                  |                  |
| Caniidae                           | <i>Canis lupus familiaris</i>    | K30                               | Y40                                           | T81  | Y82  | P83  | K352 | G353 | D354 | F355 | R356 | 9    |      |                                                      |   |  |                  |                  |
|                                    | <i>Nyctereutes procyonoides</i>  | K30                               | Y40                                           | T81  | Y82  | P83  | R352 | G353 | D354 | F355 | R356 | 8    |      |                                                      |   |  |                  |                  |
|                                    | <i>Vulpes vulpes</i>             | K30                               | Y40                                           | T81  | Y82  | P83  | K352 | G353 | D354 | F355 | R356 | 9    |      |                                                      |   |  |                  |                  |
|                                    | <i>Felis catus</i>               | K31                               | Y41                                           | T82  | Y83  | P84  | K353 | G354 | D355 | F356 | R357 | 9    |      |                                                      |   |  |                  |                  |
|                                    | <i>Lynx canadensis</i>           | K31                               | Y41                                           | T82  | Y83  | P84  | K353 | G354 | D355 | F356 | R357 | 9    |      |                                                      |   |  |                  |                  |
| Felidae                            | <i>Panthera tigris altaica</i>   | K23                               | V33                                           | T74  | W75  | P76  | K345 | G346 | D347 | F348 | R349 | 9    |      |                                                      |   |  |                  |                  |
|                                    | <i>Panthera onca</i>             | K31                               | Y41                                           | T82  | Y83  | P84  | K353 | G354 | D355 | F356 | R357 | 9    |      |                                                      |   |  |                  |                  |
| Herpestidae                        | <i>Suroctata suroictata</i>      | Q31                               | Y41                                           | A82  | Y83  | P84  | K353 | G354 | D355 | F356 | R357 | 8    |      |                                                      |   |  |                  |                  |
|                                    | <i>Lontra canadensis</i>         | K31                               | Y41                                           | T82  | Y83  | P84  | K353 | R354 | D355 | F356 | R357 | 8    |      |                                                      |   |  |                  |                  |
| Mustelidae                         | <i>Enhydra lutris kenyoni</i>    | K31                               | Y41                                           | T82  | Y83  | P84  | K353 | R354 | D355 | F356 | R357 | 8    |      |                                                      |   |  |                  |                  |
|                                    | <i>Mustela erminea</i>           | K31                               | Y41                                           | T82  | Y83  | P84  | K353 | R354 | D355 | F356 | R357 | 8    |      |                                                      |   |  |                  |                  |
|                                    | <i>Mustela putorius furo</i>     | K31                               | Y41                                           | T82  | Y83  | P84  | K353 | R354 | D355 | F356 | R357 | 8    |      |                                                      |   |  |                  |                  |
|                                    | <i>Odobenus rosmarus</i>         | K31                               | Y41                                           | T82  | Y83  | P84  | K353 | R354 | D355 | F356 | R357 | 8    |      |                                                      |   |  |                  |                  |
|                                    | <i>Urocyon vulpinus</i>          | K31                               | Y41                                           | T82  | Y83  | P84  | K353 | R354 | D355 | F356 | R357 | 8    |      |                                                      |   |  |                  |                  |
| Otaridae                           | <i>Eumetopias jubatus</i>        | K31                               | Y41                                           | T82  | Y83  | P84  | K353 | R354 | D355 | F356 | R357 | 8    |      |                                                      |   |  |                  |                  |
|                                    | <i>Zalophus californianus</i>    | K31                               | Y41                                           | T82  | Y83  | P84  | K353 | R354 | D355 | F356 | R357 | 8    |      |                                                      |   |  |                  |                  |
| Phocidae                           | <i>Neomonachus schauinslandi</i> | K31                               | Y41                                           | T82  | Y83  | P84  | K353 | R354 | D355 | F356 | R357 | 8    |      |                                                      |   |  |                  |                  |
|                                    | <i>Phoca vitulina</i>            | K31                               | Y41                                           | T82  | Y83  | P84  | K353 | R354 | D355 | F356 | R357 | 8    |      |                                                      |   |  |                  |                  |
| Procyonidae                        | <i>Procyon lotor</i>             | N31                               | Y41                                           | T82  | Y83  | P84  | K353 | G354 | D355 | F356 | R357 | 8    |      |                                                      |   |  |                  |                  |
|                                    | <i>Ailuropad melanoleuca</i>     | K31                               | Y41                                           | T82  | Y83  | P84  | K353 | G354 | D355 | F356 | R357 | 9    |      |                                                      |   |  |                  |                  |
| Ursidae                            | <i>Ursus arctos</i>              | K31                               | Y41                                           | T82  | Y83  | P84  | K353 | G354 | D355 | F356 | R357 | 9    |      |                                                      |   |  |                  |                  |
|                                    | <i>Ursus montanus</i>            | K15                               | V26                                           | T77  | W87  | P89  | K338 | G339 | D340 | F341 | R342 | 9    |      |                                                      |   |  |                  |                  |
| Viverridae                         | <i>Paguma larvata</i>            | T31                               | Y41                                           | T82  | Y83  | P84  | K353 | G354 | D355 | F356 | R357 | 8    |      |                                                      |   |  |                  |                  |
|                                    | <i>Hipposideros armiger</i>      | K31                               | H41                                           | D82  | Y83  | R84  | K353 | G354 | D355 | F356 | R357 | 7    |      |                                                      |   |  |                  |                  |
|                                    | <i>Miniopterus natalensis</i>    | G31                               | F41                                           | I82  | Y83  | P84  | K353 | G354 | D355 | F356 | R357 | 7    |      |                                                      |   |  |                  |                  |
|                                    | <i>Phyllotomus discolor</i>      | N31                               | Y41                                           | N82  | Y83  | P84  | K350 | K351 | D352 | F353 | R354 | 7    |      |                                                      |   |  |                  |                  |
|                                    | <i>Pteropus alecto</i>           | K31                               | Y41                                           | A82  | Y83  | Q84  | K353 | G354 | D355 | F356 | R357 | 8    |      |                                                      |   |  |                  |                  |
| Pteropodidae                       | <i>Pteropus vampyrus</i>         | K31                               | Y41                                           | A82  | Y83  | Q84  | K352 | G353 | D354 | F355 | R356 | 8    |      |                                                      |   |  |                  |                  |
|                                    | <i>Rousettus aegyptiacus</i>     | K31                               | Y41                                           | T82  | Y83  | Q84  | K353 | G354 | D355 | F356 | R357 | 8    |      |                                                      |   |  |                  |                  |
|                                    | <i>Rousettus leschenaulti</i>    | K31                               | Y41                                           | T82  | Y83  | Q84  | K353 | G354 | D355 | F356 | R357 | 8    |      |                                                      |   |  |                  |                  |
| Chiroptera                         | <i>Rhinolophus ferremiquemum</i> | D31                               | H41                                           | N82  | F83  | S84  | K353 | G354 | D355 | F356 | R357 | 5    |      |                                                      |   |  |                  |                  |
|                                    | <i>Rhinolophus macrotis</i>      | N31                               | Y41                                           | N82  | Y83  | P84  | K353 | G354 | D355 | F356 | R357 | 9    |      |                                                      |   |  |                  |                  |
|                                    | <i>Rhinolophus pusillus</i>      | D31                               | Y41                                           | N82  | Y83  | P84  | K353 | G354 | D355 | F356 | R357 | 8    |      |                                                      |   |  |                  |                  |
|                                    | <i>Rhinolophus sinicus</i>       | E31                               | Y41                                           | N82  | Y83  | P84  | K353 | G354 | D355 | F356 | R357 | 8    |      |                                                      |   |  |                  |                  |
| Vespertilionidae                   | <i>Eptesicus fuscus</i>          | N31                               | H41                                           | T82  | Y83  | P84  | K352 | N353 | D354 | F355 | R356 | 6    |      |                                                      |   |  |                  |                  |
|                                    | <i>Myotis brandtii</i>           | N31                               | H41                                           | T82  | Y83  | P84  | K352 | G353 | D354 | F355 | R356 | 7    |      |                                                      |   |  |                  |                  |
|                                    | <i>Myotis davidii</i>            | N11                               | H41                                           | T82  | Y83  | P84  | K352 | G353 | D354 | F355 | R356 | 7    |      |                                                      |   |  |                  |                  |
| Cingulata                          | <i>Myotis lucifugus</i>          | N31                               | H41                                           | T82  | Y83  | P84  | K352 | G353 | D354 | F355 | R356 | 7    |      |                                                      |   |  |                  |                  |
|                                    | <i>Pipistrellus abramus</i>      | K31                               | H41                                           | G82  | F83  | P84  | K352 | N353 | D354 | F355 | R356 | 6    |      |                                                      |   |  |                  |                  |
|                                    | <i>Dasylops novemcinctus</i>     | T30                               | H40                                           | N81  | F82  | S83  | K352 | G353 | D354 | F355 | R356 | 5    |      |                                                      |   |  |                  |                  |
| Dasyuriformia                      | <i>Dasyuridae</i>                |                                   |                                               |      |      |      |      |      |      |      |      |      |      |                                                      |   |  |                  |                  |
|                                    | <i>Sarcophilus harrisi</i>       | N31                               | Y41                                           | A82  | Y83  | P84  | K353 | G354 | D355 | F356 | R357 | 8    |      |                                                      |   |  |                  |                  |
| Diprotodontia                      | <i>Phascolarctidae</i>           |                                   |                                               |      |      |      |      |      |      |      |      |      |      |                                                      |   |  |                  |                  |
|                                    | <i>Phascolarctidae cinereus</i>  | T31                               | Y41                                           | T82  | F83  | P84  | K353 | G354 | D355 | F356 | R357 | 7    |      |                                                      |   |  |                  |                  |
| Eulipotyphla                       | <i>Vombatidae</i>                |                                   |                                               |      |      |      |      |      |      |      |      |      |      |                                                      |   |  |                  |                  |
|                                    | <i>Vombatus ursinus</i>          | T33                               | Y43                                           | T84  | F85  | P86  | K355 | G356 | D357 | F358 | R359 | 7    |      |                                                      |   |  |                  |                  |
| Lagomorpha                         | <i>Ericaceae europaeus</i>       | T31                               | Y41                                           | N82  | Y83  | D84  | N353 | G354 | D355 | F356 | R357 | 7    |      |                                                      |   |  |                  |                  |
|                                    | <i>Eriocapidae</i>               |                                   |                                               |      |      |      |      |      |      |      |      |      |      |                                                      |   |  |                  |                  |
| Macroscelididae                    | <i>Candylura cristata</i>        | D31                               | Y41                                           | N82  | F83  | Q84  | K348 | G349 | D350 | F351 | R352 | 6    |      |                                                      |   |  |                  |                  |
|                                    | <i>Sorex araneus</i>             | N30                               | Y40                                           | T81  | F82  | P83  | K351 | N352 | D353 | Y354 | R355 | 5    |      |                                                      |   |  |                  |                  |
|                                    | <i>Ochotonidae</i>               |                                   |                                               |      |      |      |      |      |      |      |      |      |      |                                                      |   |  |                  |                  |
|                                    | <i>Oryzopsis princeps</i>        | K41                               | H45                                           | V46  | T87  | P88  | K346 | D387 | G388 | F389 | R390 | 6    |      |                                                      |   |  |                  |                  |
|                                    | <i>Oryzotops cycloculus</i>      | K31                               | Y41                                           | T82  | Y83  | P84  | K353 | R354 | D355 | F356 | R357 | 8    |      |                                                      |   |  |                  |                  |
| Monotremata                        | Macroscelididae                  | <i>Elephantulus edwardii</i>      | Q31                                           | Y41  | N82  | F83  | P84  | K348 | G349 | D350 | F351 | R352 | 7    |                                                      |   |  |                  |                  |
|                                    |                                  | <i>Ornithorhynchus anatinus</i>   | D30                                           | Y40  | K81  | F82  | N83  | K352 | N353 | D354 | F355 | R356 | 5    |                                                      |   |  |                  |                  |
|                                    | Equidae                          | <i>Equus asinus</i>               | K31                                           | H41  | T82  | Y83  | P84  | K331 | G332 | D333 | F334 | R335 | 8    |                                                      |   |  |                  |                  |
|                                    |                                  | <i>Equus caballus</i>             | K31                                           | H41  | T82  | Y83  | P84  | K353 | G354 | D355 | F356 | R357 | 8    |                                                      |   |  |                  |                  |
|                                    | Perissodactyla                   | <i>Equus przewalskii</i>          | K31                                           | H41  | T82  | Y83  | P84  | K353 | G354 | D355 | F356 | R357 | 8    |                                                      |   |  |                  |                  |
|                                    |                                  | <i>Ceratotherium simum</i>        | K31                                           | Y41  | T82  | Y83  | P84  | K353 | G354 | D355 | F356 | R357 | 9    |                                                      |   |  |                  |                  |
|                                    | Pholidota                        | Manidae                           | <i>Manis javanica</i>                         | K31  | Y41  | N82  | Y83  | Q84  | K353 | H354 | D355 | F356 | R357 | 7                                                    |   |  |                  |                  |
|                                    |                                  |                                   | <i>Aotus nancymae</i>                         | K31  | H41  | T82  | Y83  | P84  | K353 | D354 | D355 | F356 | R357 | 6                                                    |   |  |                  |                  |
|                                    |                                  | Cebidae                           | <i>Sapajus apella</i>                         | K31  | H41  | T82  | Y83  | P84  | K353 | Q354 | D355 | F356 | R357 | 7                                                    |   |  |                  |                  |
|                                    |                                  |                                   | <i>Nasua fuscescens</i>                       | K31  | Y41  | M82  | Y83  | P84  | K353 | G354 | D355 | F356 | R357 | 10                                                   |   |  |                  |                  |
|                                    |                                  | Cercopithecoidea                  | <i>Cercopithecus atys</i>                     | K31  | Y41  | M82  | Y83  | P84  | K353 | G354 | D355 | F356 | R357 | 10                                                   |   |  |                  |                  |
|                                    |                                  |                                   | <i>Cercopithecus aethiops</i>                 | K31  | Y41  | M82  | Y83  | P84  | K353 | G354 | D355 | F356 | R357 | 10                                                   |   |  |                  |                  |
|                                    |                                  |                                   | <i>Chlorocebus sabaeus</i>                    | K31  | Y41  | M82  | Y83  | P84  | K353 | G354 | D355 | F356 | R357 | 10                                                   |   |  |                  |                  |
|                                    |                                  |                                   | <i>Macaca mulatta</i>                         | K31  | Y41  | M82  | Y83  | P84  | K353 | G354 | D355 | F356 | R357 | 10                                                   |   |  |                  |                  |
|                                    |                                  |                                   | <i>Macaca nemestrina</i>                      | K31  | Y41  | M82  | Y83  | P84  | K353 | G354 | D355 | F356 | R357 | 10                                                   |   |  |                  |                  |
|                                    |                                  |                                   | <i>Mandrillus leucophaeus</i>                 | K31  | Y41  | M82  | Y83  | P84  | K353 | G354 | D355 | F356 | R357 | 10                                                   |   |  |                  |                  |
|                                    |                                  | Primates                          | <i>Papias leucon</i>                          | K31  | M82  | Y83  | P84  | K353 | G354 | D355 | F356 | R357 | 10   |                                                      |   |  |                  |                  |
|                                    |                                  |                                   | <i>Ptilocobus tephrosceles</i>                | K31  | Y41  | M82  | Y83  | P84  | K353 | G354 | D355 | F356 | R357 | 10                                                   |   |  |                  |                  |
| <i>Theropithecus gazella</i>       | K31                              |                                   | Y41                                           | M82  | Y83  | P84  | K353 | G354 | D355 | F356 | R357 | 10   |      |                                                      |   |  |                  |                  |
| <i>Rhinopithecus roxellana</i>     | K31                              |                                   | Y41                                           | M82  | Y83  | P84  | K353 | G354 | D355 | F356 | R357 | 10   |      |                                                      |   |  |                  |                  |
| Cherogaleidae                      | <i>Trachypithecus francoisi</i>  | K31                               | Y41                                           | M82  | Y83  | P84  | K353 | G354 | D355 | F356 | R357 | 10   |      |                                                      |   |  |                  |                  |
|                                    | <i>Microcebus murinus</i>        | N57                               | H67                                           | T108 | V109 | P110 | K379 | G380 | D381 | F382 | R383 | 7    |      |                                                      |   |  |                  |                  |
|                                    | <i>Galagoides</i>                |                                   |                                               |      |      |      |      |      |      |      |      |      |      |                                                      |   |  |                  |                  |
|                                    | <i>Otolemur garnettii</i>        | N31                               | H41                                           | T82  | Y83  | P84  | K353 | D354 | D355 | F356 | R357 | 6    |      |                                                      |   |  |                  |                  |
|                                    | <i>Calithrix jacchus</i>         | K31                               | Y41                                           | T82  | Y83  | P84  | K353 | D354 | D355 | F356 | R357 | 7    |      |                                                      |   |  |                  |                  |
|                                    | Cebidae                          | <i>Cebus fuscus</i>               | K31                                           | H41  | T82  | Y83  | P84  | K353 | D354 | D355 | F356 | R357 | 7    |                                                      |   |  |                  |                  |
|                                    |                                  | <i>Homo sapiens</i> </            |                                               |      |      |      |      |      |      |      |      |      |      |                                                      |   |  |                  |                  |

## SUPPLEMENTARY FIGURE LEGENDS

Supplementary Fig. S1. Comparisons of *ACE2* genes in 132 mammalian species at 15 key human *ACE2* sites involved in SARS-CoV-2 S protein binding. These species belong to the orders a) Primates, b) Artiodactyla, c) Chiroptera, d) Canivora, and e) Rodentia, and in panel f) displays species belonging to 14 other orders. All *ACE2* genes are aligned using MAFFT with option G-INS-i. Highlighted blue and red are matching and mis-matching amino acid residues, respectively, between mammalian *ACE2* and human *ACE2*. Total similarity designates the total number of matching amino acid residues with respect to human *ACE2*. The total similarity score for mammalian *ACE2* in blue highlights perfect site similarities (14 to 15 matching sites), in green highlights high similarity (12 to 13 matching sites), in light green highlights medium-high similarity (10 to 11 matching sites), in yellow highlights medium similarity (8 to 9 matching sites), in orange highlights medium-low similarity (6 to 7 matching sites), and in red highlights low similarity (5 or less matching sites).

Supplementary Fig. S2. Phylogenetic reconstruction based on 132 MAFFT G-INS-i aligned mammalian *ACE2* amino acid sequences. The tree is built with the maximum-likelihood-based PHYML approach, with best substitution model = JTT + G + I + F, Bootstrap = 500, and Outgroup = *Ornithorhynchus anatinus*. Mammalian species names are colored based on total similarity at *ACE2* against human *ACE2*: in blue highlights perfect site similarity (14 to 15 matching sites), in green highlights high similarity (12 to 13 matching sites), in light green highlights medium-high similarity (10 to 11 matching sites), in yellow highlights medium similarity (8 to 9 matching sites), in orange highlights medium-low similarity (6 to 7 matching sites), and in red highlights low similarity (5 or less matching sites).

Supplementary Fig. S3. Comparisons of *ACE2* genes in 132 mammalian species at 10 key human *ACE2* sites involved in SARS-CoV S protein binding. These species belong to the orders Primates, Artiodactyla, Chiroptera, Canivora, Rodentia, and 14 other orders. All *ACE2* genes are aligned using MAFFT with option G-INS-i. Highlighted blue and red are matching and mis-matching amino acid residues, respectively, between mammalian *ACE2* and human *ACE2*. Total similarity designates the total number of matching amino acid residues with respect to human *ACE2*. The total similarity score for mammalian *ACE2* in blue highlights perfect site similarities (10 matching sites), in green highlights high similarity (8 to 9 matching sites), in light green highlights medium-high similarity (6 to 7 matching sites), in yellow highlights medium similarity (4 to 5 matching sites), in orange highlights medium-low similarity (2 to 3 matching sites), and in red highlights low similarity (1 or less matching sites).
